# Supplementary material for: Worm-like porous and defect-structured cadmium stannate photoanodes for enhanced solar water oxidation
Source: Royal Society of Chemistry journal article supplement (doi:10.1039/d1na00828e), 2022-01-01
Supplement: d1na00828e1.pdf [file d1na00828e1.pdf]

## Supporting Information

Wormlike Porous and Defect-structured Cadmium Stannate

Photoanodes for Enhanced Solar Water Oxidation

*Pan Peng,<sup>a,b,1</sup> Ping Wang,<sup>b,1,\*</sup> Zhengyang Cai,<sup>a,b</sup> Jiajia Zhang,<sup>a</sup> Yu Hu,<sup>a</sup> Jingcheng Xu,<sup>a</sup>  
Xianying Wang<sup>b,\*</sup>*

<sup>a</sup> School of Materials Science and Technology, University of Shanghai for Science and Technology, Jungong Rd. 516, 200093 Shanghai, P.R. China.

<sup>b</sup> Shanghai Institute of Ceramics, Chinese Academy of Sciences, Heshuo Rd. 585, 201899 Shanghai, P.R. China. Email: wangping@mail.sic.ac.cn; wangxianying@mail.sic.ac.cn

<sup>1</sup> These authors contributed equally.

## Photoelectrochemical measurements

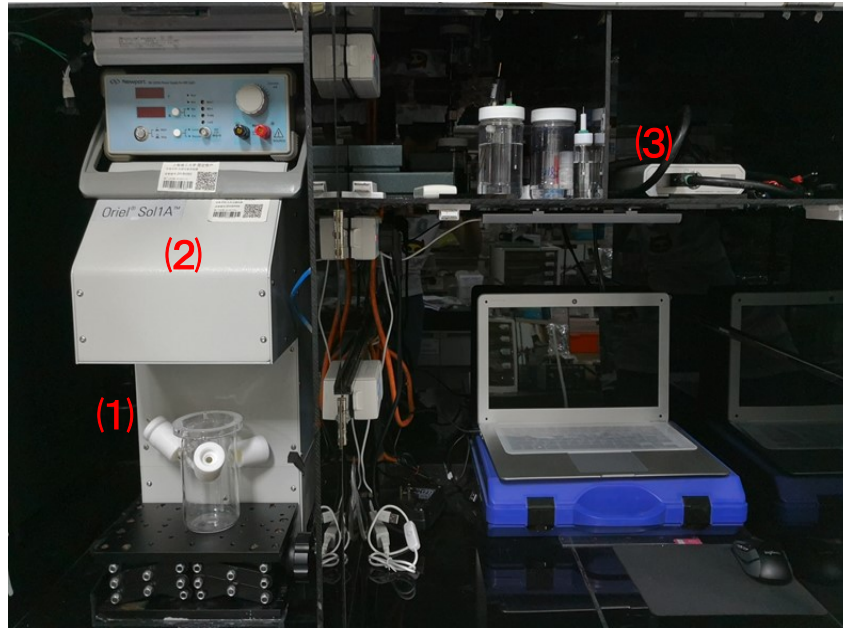

Measurement setup descriptions: (1) photocurrent-potential curves, electrochemical impedance spectra (EIS) and Mott-Schottky (MS) analysis were conducted in a standard three-electrode configuration system. (2) A Newport AM 1.5 G solar simulator (150 W Oriel model 94021A, Newport/Oriel instruments, USA) was used as a light source. (3) All the electrochemical tests were measured via a Ivium CompactStat potentiostat.

Electrochemical Impedance Spectra (EIS) analyses are carried out at 0 V vs SCE at a frequency range of 100 kHz to 0.1 Hz with an amplitude of 10 mV under AM 1.5G illumination.

Mott-Schottky measurements were carried out at a frequency of 1 kHz in dark. The donor densities were calculated by Mott-Schottky equation:

$$\frac{1}{C^2} = \frac{2}{e_0 \epsilon \epsilon_0 N_d} \left[ (V - V_f) - \frac{kT}{e_0} \right]$$
$$N_d = \frac{2}{e_0 \epsilon \epsilon_0} \left[ d \left( \frac{1}{C^2} \right) / dV \right]^{-1}$$

Where  $e_0$  is the electron charge,  $\epsilon$  is the relative permittivity of  $\text{BiVO}_4$  ( $\epsilon = 68$ ),  $\epsilon_0$  is the permittivity of vacuum,  $N_d$  is the donor density,  $V$  is the applied bias at the electrode,  $V_f$  is the flatband potential.

## Charge efficiencies calculation

Bulk charge separation efficiency ( $\eta_{bulk}$ ) and interfacial charge transfer efficiency  $\eta_{surface}$  were calculated by the following equations:<sup>1-2</sup>

$$\eta_{bulk} = J_{ph}^{Na_2SO_3} / J_{abs}$$

$$\eta_{surface} = J_{ph}^{H_2O} / J_{ph}^{Na_2SO_3}$$

Where  $J_{ph}^{H_2O}$  and  $J_{ph}^{Na_2SO_3}$  are the photocurrent density measured in electrolyte solution without and with 0.1M Na<sub>2</sub>SO<sub>3</sub> as a hole scavenger, respectively.  $J_{abs}$  is the photon absorption rate expressed

as the photocurrent density, which was calculated by:  $J_{abs} = \frac{q}{hc} \int_{\lambda} \lambda \cdot \phi_{\lambda} \cdot \eta_{abs} d\lambda$ , where  $q$  is the charge of an electron,  $h$  is the Plank constant,  $c$  is the light speed,  $\phi_{\lambda}$  is the photon flux of the AM 1.5G solar spectrum,  $\eta_{abs}$  is the absorbance of the photoanode.

### Incident-photon-to-current-conversion efficiency

The incident-photon-to-current-conversion efficiency (IPCE) were performed by measuring the photocurrent density under monochromated light irradiation with a 500 W Xe arc lamp coupled into a grating monochromator, which were then calculated following the equation:

$$IPCE = \frac{1239.8(V \times nm) \times |j_{ph}(mA/cm^2)|}{\lambda(nm) \times P_{mono}(mW/cm^2)} \times 100\%$$

Where  $j_{ph}$  is the photocurrent density,  $\lambda$  the incident light wavelength, and  $P_{mono}$  is the calibrated and monochromated illumination power intensity<sup>3</sup>. The illumination intensities of the monochromatic light were measured with a PM 100A Optical Power Meter.

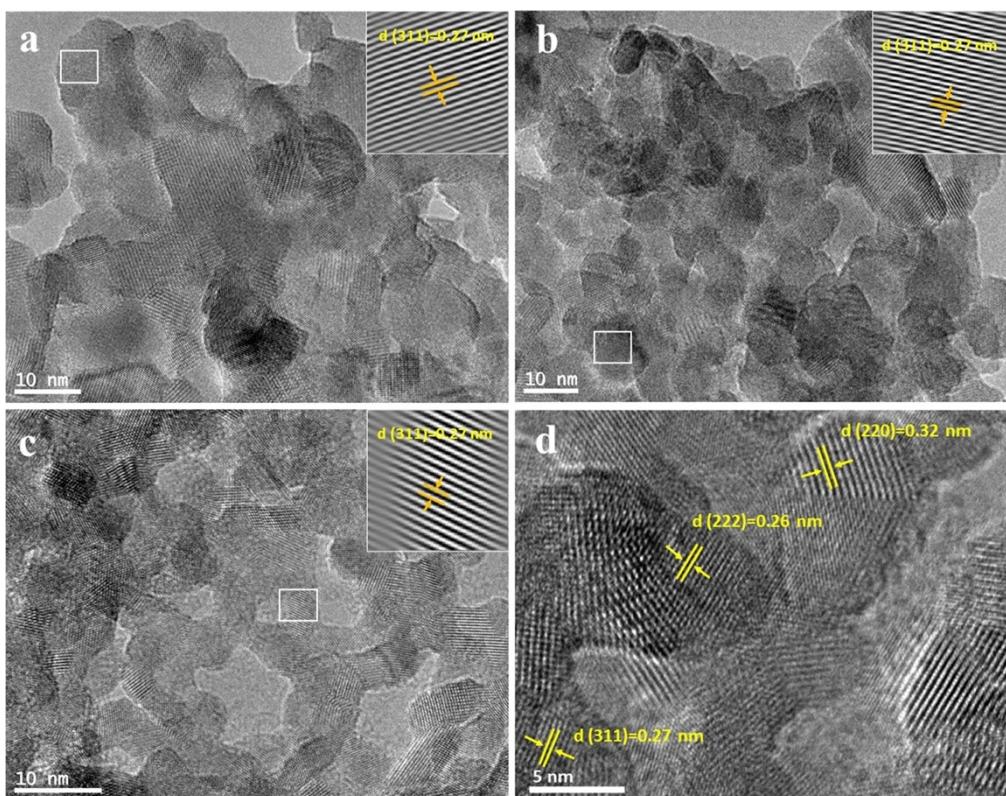

**Figure S1.** HRTEM image of (a) CTA500, (b) CTA500-HMA5, (c-d) HMA8 and the corresponding auto-correlated HRTEM lattice image (the inset).

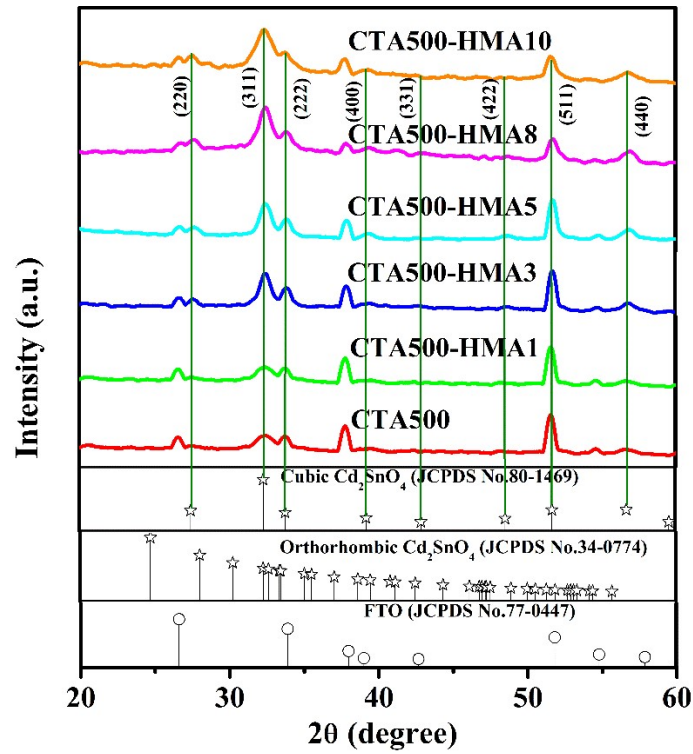

**Figure S2.** XRD patterns of CTA500, CTA500-HMA1, CTA500-HMA3, CTA500-HMA5, CTA500-HMA8, CTA500-HMA10 showing the formation of pure- phase cubic  $\text{Cd}_2\text{SnO}_4$ .

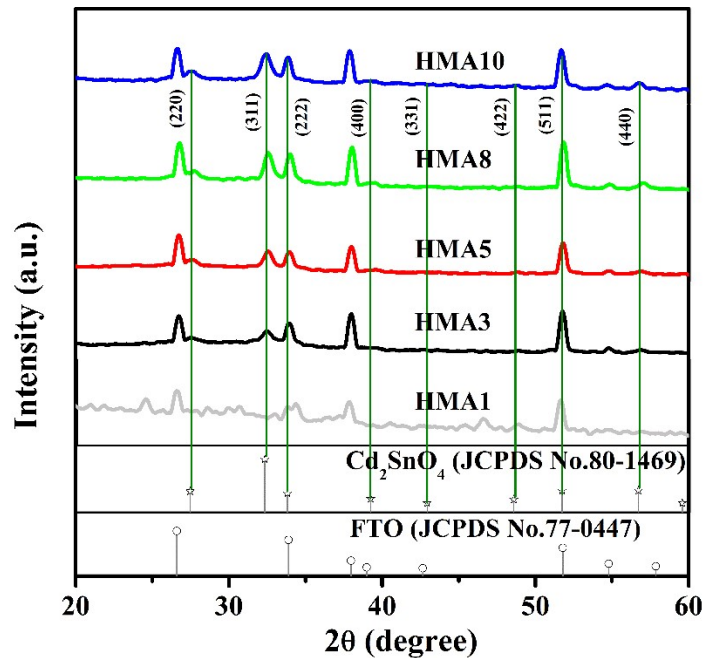

**Figure S3.** XRD patterns of HMAX samples with the prolonged HMA time, showing the formation of pure-phase cubic  $\text{Cd}_2\text{SnO}_4$  in HMA3, HMA5, HMA8, and HMA10 samples, while large number of CdO impurities were co-existed in HMA1.

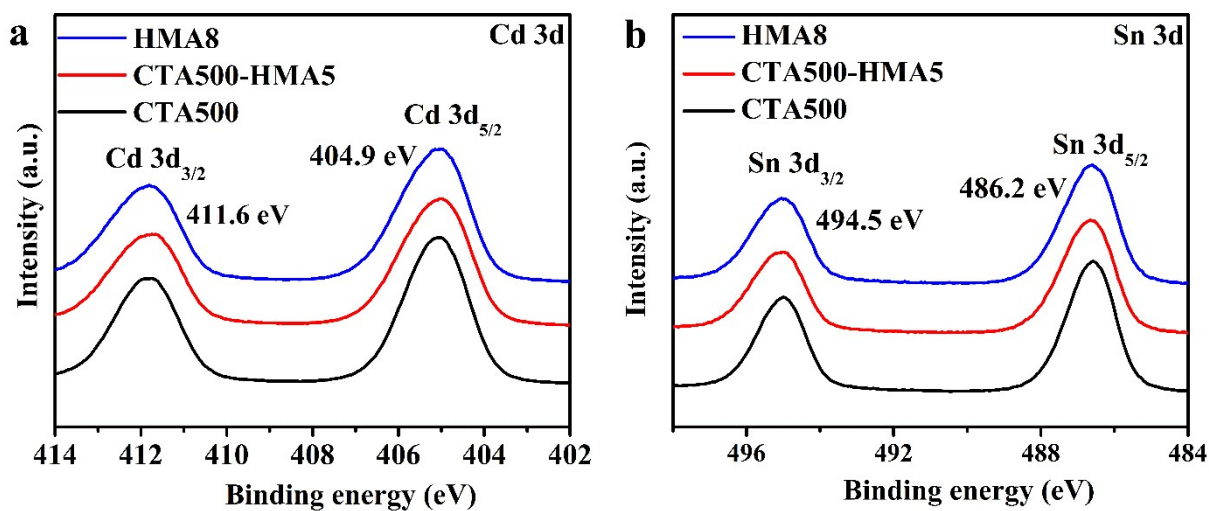

**Figure S4.** The narrow-scan XPS spectra of (a) Cd 3d and Sn 3d (b) in CTA500, CTA500-HMA5 and HMA8 samples.

**Table S1.** Atomic concentration (at%) of Cd and Sn elements derived from survey-scan XPS spectra.

| At. %       | Cd  | Sn  |
|-------------|-----|-----|
| CTA500      | 6.9 | 4.7 |
| CTA500-HMA5 | 6.0 | 4.0 |
| HMA8        | 7.0 | 4.7 |

**Table S2.** Atomic concentration (at%) of Cd and Sn elements obtained from ICP-OES.

| At. %       | Cd    | Sn    |
|-------------|-------|-------|
| CTA500      | 17.83 | 13.25 |
| CTA500-HMA5 | 11.53 | 7.77  |
| HMA8        | 14.32 | 10.26 |

**Table S3.** Atomic ratios of  $O_L$ ,  $O_V$  and  $O_C$  calculated from the XPS spectra in Figure 2d.

| Samples     | $O_L$ | $O_V$ | $O_C$ |
|-------------|-------|-------|-------|
| CTA500      | 16.7  | 22.3  | 61.0  |
| CTA500-HMA5 | 16.0  | 22.9  | 61.1  |
| HMA8        | 14.4  | 24.4  | 61.2  |

**Table S4.** Estimation of conduction band ( $E_{CB}$ ) and valence band ( $E_{VB}$ ) of CTA500, CTA500-HMA5 and HMA8 samples by Mott-Schottky plots (MS) analysis.

| Samples     | $E_{FB}(eV)$ | $E_{CB}(eV)$ | $E_{VB}(eV)$ |
|-------------|--------------|--------------|--------------|
| CTA500      | -0.78        | -0.88        | 1.72         |
| CTA500-HMA5 | -0.79        | -0.89        | 1.65         |
| HMA8        | -0.80        | -0.90        | 1.62         |

**Table S5.** Performance comparison with other typical photocatalytic materials.

| Photoanodes<br>( $C_x/J_1, J_2, J_3$ ) | Annealing method                              | $J$<br>( $\mu A\ cm^{-2}$ ) | $J_{x=1,2}$<br>( $\mu A\ cm^{-2}$ ) | Ref.             |
|----------------------------------------|-----------------------------------------------|-----------------------------|-------------------------------------|------------------|
| <b><math>Cd_2SnO_4(C_1/J_1)</math></b> | <b>HMA (8min)</b>                             | <b>25</b>                   | <b>300</b>                          | <b>This Work</b> |
|                                        | <b>CTA (500°C, 2 h)<br/>&amp; HMA (5 min)</b> | <b>13</b>                   | <b>100</b>                          |                  |
|                                        | <b>CTA (500°C, 2 h)</b>                       | <b>4</b>                    | <b>30</b>                           |                  |
| $BiVO_4(C_2/J_1)$                      | CTA (470°C, 5 h)                              | 30                          | 400                                 | 1                |
|                                        | HMA (6 min)                                   | 80                          | 1400                                |                  |
| $ZnFe_2O_4(C_3/J_2)$                   | CTA (550°C, 3 h)                              | 15                          | 171                                 | 4                |
|                                        | CTA (800°C, 20 min)                           | 25                          | 50                                  |                  |



|                                               |                                                               |     |     |   |
|-----------------------------------------------|---------------------------------------------------------------|-----|-----|---|
|                                               | CTA (550°C, 3 h)<br>& HMA (5 min)                             | 240 | 320 |   |
| $\text{Cd}_2\text{SnO}_4$ ( $J_3$ )           | CTA (550°C, 2 h)<br>& CTA (750°C, 2 h)                        |     | 220 | 5 |
| Cubic: $\text{Cd}_2\text{SnO}_4$<br>( $C_4$ ) | CTA (550°C, 2 h)<br>& CTA (750°C, 2 h)                        | 280 |     | 6 |
| Ortho: $\text{Cd}_2\text{SnO}_4$<br>( $C_4$ ) | CTA (550°C, 2 h)<br>& CTA (750°C, 2 h) &<br>CTA (1050°C, 2 h) | 124 |     | 6 |
| $\text{Cd}_2\text{SnO}_4$ ( $C_4$ )           | CTA (550°C, 2 h)<br>& CTA (750°C, 12 h)                       | 357 |     | 6 |
| $\text{ZnFe}_2\text{O}_4$ ( $C_3$ )           | HMA (2 min)                                                   | 150 |     |   |
|                                               | CTA (850°C, 7.5<br>min)                                       | 40  |     | 7 |
| $\alpha\text{-Fe}_2\text{O}_3$ ( $C_3/J_2$ )  | CTA (600°C, 1h)                                               | 13  | 60  |   |
|                                               | HMA (10 min)                                                  | 320 | 580 | 8 |

$C_1$ : 1 M KOH, 1.7  $V_{\text{RHE}}$ ;  $C_2$ : 0.5 M KPi, 1.23  $V_{\text{RHE}}$ ;  $C_3$ : 1 M KOH, 1.23  $V_{\text{RHE}}$ ;  $C_4$ : 1 M NaOH, 0.6  $V_{\text{RHE}}$ .  $J_1$ :  $\text{Na}_2\text{SO}_3$  as the sacrificial reagent.  $J_2$ :  $\text{H}_2\text{O}_2$  as a hole scavenger.  $J_3$ : 0.8  $V_{\text{RHE}}$ , 0.24 M  $\text{Na}_2\text{S}$  and 0.35 M  $\text{Na}_2\text{SO}_3$  electrolyte.

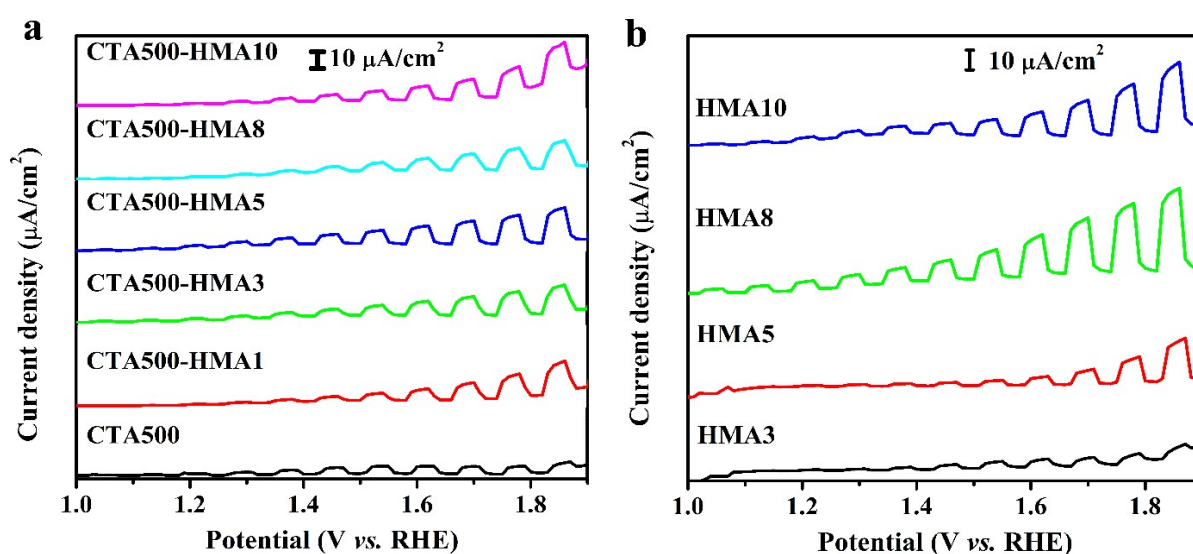



**Figure S5.** (a) Linear sweep voltammetry (LSV) curves of the  $\text{Cd}_2\text{SnO}_4$  samples under chopped light illumination (1 sun) at the scanning rate of 10 mV/s. (b) LSV curves of HMA samples prepared at different HMA times under chopped light illumination (1 sun) at the scanning rate of 10 mV/s.

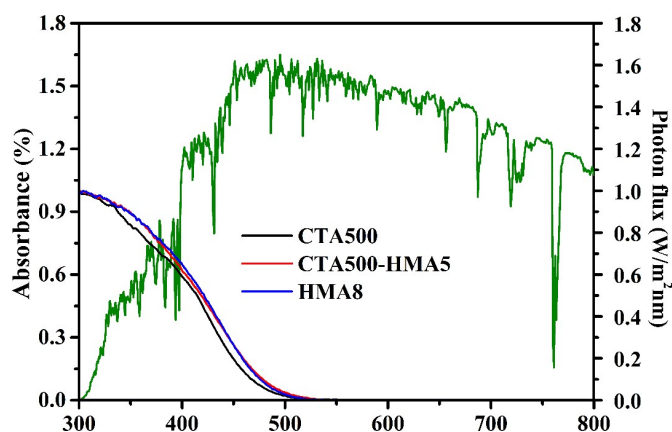

**Figure S6.** The  $J_{\text{abs}}$  values of CTA500, CTA500-HMA5 and HMA8 calculated to be 5.21, 5.61, and 5.63  $\text{mA}/\text{cm}^2$ , respectively.

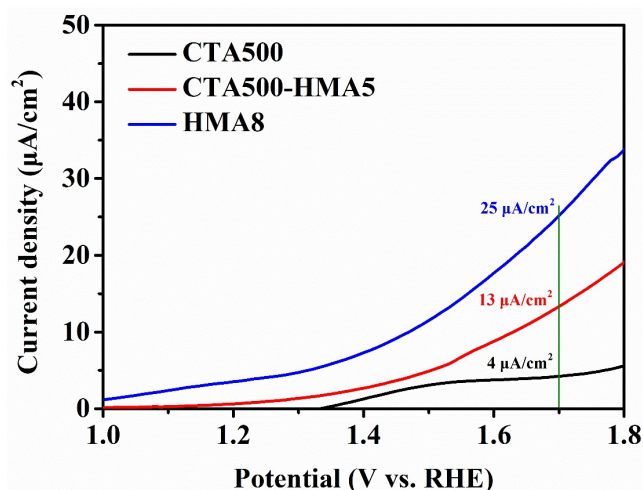

**Figure S7.** The LSV measurements of the recycled CTA500, CTA500-HMA5 and HMA8 after the stability test.

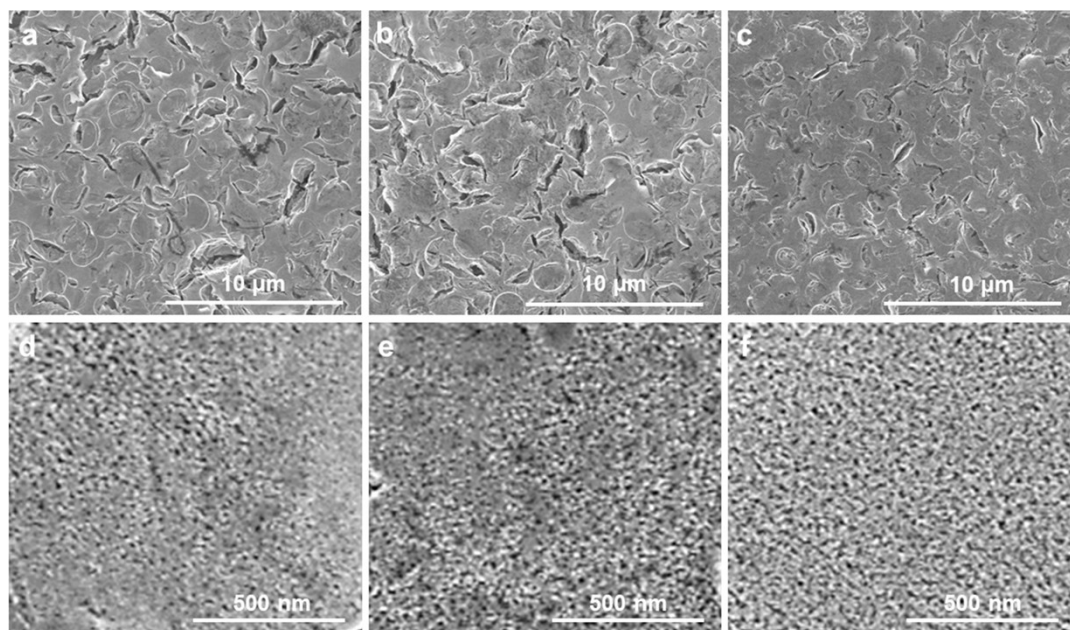

**Figure S8.** Typical SEM images of the recycled CTA500 (a, d), CTA500-HMA5 (b, e) and HMA8 (c, f).

## REFERENCES

1. J. H. Kim, Y. H. Jo, J. H. Kim and J. S. Lee, *Nanoscale*, 2016, **8**, 17623-17631.
2. H. Zhang, H. Li, Z. Wang, Z. Zheng, P. Wang, Y. Liu, X. Zhang, X. Qin, Y. Dai and B. Huang, *Appl. Catal. B*, 2018, **238**, 586-591.
3. C. Jiang, S. J. Moniz, A. Wang, T. Zhang and J. Tang, *Chem. Soc. Rev.*, 2017, **46**, 4645-4660.
4. J. H. Kim, J. H. Kim, J. Jang, J. Y. Kim, S. H. Choi, G. Magesh, J. Lee, and J. S. Lee, *Adv. Energy Mater.*, 2015, **5**, 1401933.
5. S. Kelkar, C. Ballal, A. Deshpande, S. Warule and S. Ogale, *J. Mater. Chem. A*, 2013, **1**, 12426-124316.
6. A. Deshpande, S. Kelkar, S. Rayaluc and S. Ogale, *J. Mater. Chem. A*, 2014, **2**, 492-499.
7. J. H. Kim, Y. J. Jang, S. H. Choi, B. J. Lee, M. H. Lee, and J. S. Lee, *ACS Sustainable Chem. Eng.*, 2019, **7**, 944-949
8. K. Ramachandran, M. Geerthana, P. Maadeswaran, B. Liang and R. Ramesh, *Optik*, 2020, **212**, 164658.
